# Supplementary material
Source: publisher site journal article supplement (https://static.cambridge.org/content/id/urn:cambridge.org:id:article:S0014479720000137/resource/name/S0014479720000137supp001.docx)
Supplement: Supplementary file 1 [file S0014479720000137supp001.docx]

Supplementary Material Table S1. Correlation between soil properties and mineral composition of cocoyam cormels (pooled data of 2017 and 2018

|  | N | P | K | Ca | Mg | Cu | Zn | Fe |
| --- | --- | --- | --- | --- | --- | --- | --- | --- |
| Bulk | -0.848** | -0.765* | -0.884** | -0.819* | -0.902** | -0.809* | -0.847** | -0.840** |
| Density | (0.008) | (0.027) | (0.004) | (0.013) | (0.002) | (0.015) | (0.008) | (0.009) |
| Total | 0.849** | 0.766* | 0.885** | 0.819* | 0.903** | 0.810* | 0.847** | 0.841** |
| porosity | (0.008) | (0.027) | (0.004) | (0.013) | (0.002) | (0.015) | (0.008) | (0.009) |
| Moisture | 0.813* | 0.656 | 0.857** | 0.765* | 0.858** | 0.758 | 0.809* | 0.792* |
| Content | (0.014) | (0.077) | (0.007) | (0.027) | (0.006) | (0.29) | (0.015) | (0.019) |
| Ph | 0.656 | 0.500 | 0.549 | 0.567 | 0.613 | 0.686 | 0.649 | 0.624 |
|  | (0.078) | (0.207) | (0.132) | (0.142) | (0.074) | (0.061) | (0.082) | (0.098) |
| Organic | 0.912** | 0.879** | 0.974** | 0.813* | 0.986** | 0.952** | 0.923** | 0.896** |
| Carbon | (0.002) | (0.004) | (0.000) | (0.014) | (0.000) | (0.000) | (0.001) | (0.003) |
| N | 0.960** | 0.932** | 0.943** | 0.865** | 0.974** | 0.993** | 0.942** | 0.944** |
|  | (0.000) | (0.001) | (0.000) | (0.006) | (0.000) | (0.000) | (0.000) | (0.000) |
| P | 0.975** | 0.913** | 0.969** | 0.940** | 0.899** | 0.908** | 0.999** | 0.974** |
|  | (0.000) | (0.002) | (0.000) | (0.001) | (0.002) | (0.002) | (0.000) | (0.000) |
| K | 0.797* | 0.674 | 0.845* | 0.696 | 0.881** | 0.794* | 0.766* | 0.763* |
|  | (0.018) | (.067) | (0.008) | (0.055) | (0.004) | (0.019) | (0.027) | (0.028) |
| Ca | 0.891** | 0.805* | 0916** | 0.830* | 0.927** | 0.861** | 0.866** | 0.878** |
|  | (0.003) | (0.016) | (0.001) | (0.011) | (0.001) | (0.006) | (0.005) | (0.004) |
| Mg | 0.857** | 0.756* | 0.936** | 0.777* | 0.928** | 0.838** | 0.864** | 0.834** |
|  | (0.007) | (0.030) | (0.001) | (0.023) | (0.001) | (0.009) | (0.006) | (0.010) |

**Correlation is significant at the level of 0.01 (2-tailed)

*Correlation is significant at the level of 0.05 (2-tailed)

Supplementary Material Table S2. Correlation between soil properties and growth and yield of cocoyam (pooled data of 2017 and 2018

|  | Plant height | Number of leaves | Leaf area | Corm yield | Cormel yield |
| --- | --- | --- | --- | --- | --- |
| Bulk | -0.894** | -0.840** | -0.889** | -0.864** | -0.864** |
| density | (0.003) | (0.009) | (0.002) | (0.006) | (0.006) |
| Total | 0.895** | 0.841** | 0.841** | 0.864* | 0.864* |
| porosity | (0.003) | (0.009) | (0.009) | (0.000) | (0.000) |
| Moisture | 0.855** | 0.804* | 0.848** | 0.811* | 0.811* |
| content | (0.007) | (0.016) | (0..008) | (0.015) | (0.015) |
| pH | 0.753* | 0.804* | 0.749* | 0.686 | 0.686 |
|  | (0.031) | (0.016) | (0.032) | (0.060) | (0.060) |
| Organic | 0.974** | 0.981** | 0.965** | 0.956** | 0.956** |
| carbon | (0.000) | (0.000) | (0.000) | (0.000 | (0.000 |
| N | 0.988** | 0.946** | 0.995** | 0.990** | 0.990** |
|  | (0.000) | (0.000) | (0.000) | (0.000) | (0.000) |
| P | 0.957** | 0.828* | 0.944** | 0.973** | 0.973** |
|  | (0.000) | (0.011) | (0.000) | (0.000) | (0.000) |
| K | 0.863** | 0.875** | 0.858** | 0.807* | 0.807* |
|  | (0.000) | (0.004) | (0.006) | (0.015) | (0.015) |
| Ca | 0.937** | 0.903** | 0.929** | 0.898** | 0.898** |
|  | (0.001) | (0.002) | (0.001) | (0.002) | (0.002) |
| Mg | 0.917** | 0.910** | 0.901** | 0.875** | 0.875** |
|  | (0.001) | (0.002) | (0.002) | (0.004) | (0.004) |

**Correlation is significant at the level of 0.01 (2-tailed)

*Correlation is significant at the level of 0.05 (2-tailed)
